# Supplementary material for: Tislelizumab combined with radiotherapy for unresectable locally advanced esophageal squamous cell carcinoma: A prospective, single-arm, phase II study (TREC)
Source: Research Square preprint supplement (doi:10.21203/rs.3.rs-7857613/v1), 2025-11-28
Supplement: Supplementary file 1 [file ce72eb07881145ffb3b79443.docx]

| Characteristic | n=28 |
| --- | --- |
| Age (years), median(range) | 67 (55-80) |
| <75,n (%) | 19(67.9%) |
| ≥75,n(%) | 9(32.1%) |
| Gender, n(%) |  |
| Male | 16(57.1%) |
| Female | 12(42.9%) |
| ECOG PS, n(%) |  |
| 0 | 11(39.3%) |
| 1 | 17(60.7%) |
| Clinical stage, n(%) |  |
| II | 4(14.3%) |
| III | 19(67.9%) |
| IV | 5(17.9%) |
| Tumor location, n(%) |  |
| Cervical | 1(3.6%) |
| Upper thoracic | 3(10.7%) |
| Middle thoracic | 14(50.0%) |
| Lower thoracic | 10(35.7%) |

**Table 1. Baseline characteristics of the patients**

| Best overall response | Efficacy analysis set(n=28) |
| --- | --- |
| PD,n(%) | 0(%) |
| SD,n(%) | 5(17.9%) |
| PR,n(%) | 20(71.4%) |
| CR,n(%) | 3(10.7%) |
| pCR,n (%) | 18(64.3%) |
| non-pCR,n (%) | 10(35.7%) |
| ORR,n (%) | 23(82.1%) |
| DCR,n(%) | 28(100%) |
| Median PFS,months [95%Cl] | 23.5 months [18.2–not reached] |
| Median OS,months [95%Cl] | Not Reached |

**Table 2 Response data of the efficacy analysis set**

| Adverse Events | Grade 1 | | Grade 2 | | Grade 3 | | Grade 4 | | Grade 5 | |
| --- | --- | --- | --- | --- | --- | --- | --- | --- | --- | --- |
|  | n | % | n | % | n | % | n | % | n | % |
| Esophagitis | 5 | 17.86% | 15 | 53.57% |  |  |  |  |  |  |
| Checkpoint inhibitor pneumonitis |  |  | 3 | 10.71% |  |  |  |  |  |  |
| Radiation pneumonitis |  |  | 3 | 10.71% |  |  |  |  |  |  |
| Lung infection |  |  |  |  | 2 | 7.14% |  |  | 1 | 3.57% |
| Radiation dermatitis | 2 | 7.14% | 1 | 3.57% |  |  |  |  |  |  |
| Hypokalemia | 2 | 7.14% |  |  |  |  |  |  |  |  |
| Hyperkalemia | 1 | 3.57% |  |  |  |  |  |  |  |  |
| Hyponatremia | 13 | 46.43% | 1 | 3.57% |  |  |  |  |  |  |
| Hypocalcemia | 10 | 35.71% | 1 | 3.57% |  |  |  |  |  |  |
| Hypomagnesemia | 7 | 25.00% |  |  |  |  |  |  |  |  |
| Hypermagnesemia | 2 | 7.14% |  |  | 1 | 3.57% |  |  |  |  |
| Hyperglycemia | 5 | 17.86% | 1 | 3.57% |  |  |  |  |  |  |
| Hyperlipidemia | 1 | 3.57% |  |  |  |  |  |  |  |  |
| Hypertriglyceridemia | 2 | 7.14% |  |  |  |  |  |  |  |  |
| Hypercholesterolemia | 6 | 21.43% |  |  |  |  |  |  |  |  |
| Hypoalbuminemia | 6 | 21.43% | 5 | 17.86% |  |  |  |  |  |  |
| Hyperuricemia | 3 | 10.71% |  |  |  |  |  |  |  |  |
| Hyperthyroidism | 1 | 3.57% |  |  |  |  |  |  |  |  |
| Hypothyroidism | 1 | 3.57% | 4 | 14.29% |  |  |  |  |  |  |
| Thyroid stimulating hormone increased / decreased | 1 | 3.57% |  |  |  |  |  |  |  |  |
| Adrenal insufficiency | 1 | 3.57% | 1 | 3.57% |  |  |  |  |  |  |
| GGT increased | 1 | 3.57% |  |  |  |  |  |  |  |  |
| Fibrinogen decreased | 1 | 3.57% |  |  |  |  |  |  |  |  |
| Blood lactate dehydrogenase increased | 5 | 17.86% |  |  |  |  |  |  |  |  |
| Leukopenia | 9 | 32.14% | 5 | 17.86% |  |  |  |  |  |  |
| Anemia | 4 | 14.29% | 3 | 10.71% |  |  |  |  |  |  |
| Eosinophilia | 1 | 3.57% |  |  |  |  |  |  |  |  |
| Neutropenia | 10 | 35.71% |  |  |  |  |  |  |  |  |
| Lymphopenia |  |  | 7 | 25.00% | 15 | 53.57% |  |  |  |  |
| Pain |  |  | 1 | 3.57% |  |  |  |  |  |  |
| Weight loss | 10 | 35.71% | 2 | 7.14% |  |  |  |  |  |  |
| Weight gain | 1 | 3.57% | 1 | 3.57% | 1 | 3.57% |  |  |  |  |
| Constipation | 3 | 10.71% |  |  |  |  |  |  |  |  |
| Diarrhea | 1 | 3.57% |  |  |  |  |  |  |  |  |
| Anorexia | 2 | 7.14% | 5 | 17.86% |  |  |  |  |  |  |
| Vomiting |  |  | 2 | 7.14% |  |  |  |  |  |  |
| Flu-like syndrome | 5 | 17.86% |  |  |  |  |  |  |  |  |
| Cough | 3 | 10.71% |  |  |  |  |  |  |  |  |
| Skin and subcutaneous tissue disorders (Other) |  |  | 3 | 10.71% |  |  |  |  |  |  |
| Urethral infection |  |  |  |  | 1 | 3.57% |  |  |  |  |
| Esophageal stenosis |  |  | 1 | 3.57% | 1 | 3.57% |  |  |  |  |
| Esophageal ulcer | 1 | 3.57% |  |  |  |  |  |  |  |  |
| Hiccups |  |  | 1 | 3.57% |  |  |  |  |  |  |
| Pleural effusion |  |  | 1 | 3.57% |  |  |  |  |  |  |
| Atrial fibrillation |  |  | 1 | 3.57% |  |  |  |  |  |  |
| Esophageal fistula |  |  |  |  | 1 | 3.57% |  |  |  |  |
| immune checkpoint inhibitor-related myocarditis |  |  | 1 | 3.57% |  |  |  |  |  |  |
| Immune-related hepatotoxicity |  |  |  |  | 1 | 3.57% |  |  |  |  |
| myocardial infarction |  |  |  |  |  |  |  |  | 1 | 3.57% |
| Vascular access complication |  |  |  |  |  |  |  |  | 1 | 3.57% |
| Peripheral neuropathy | 1 | 3.57% |  |  |  |  |  |  |  |  |
| Alanine aminotransferase increased |  |  |  |  | 1 | 3.57% |  |  |  |  |
| Aspartate aminotransferase increased |  |  |  |  | 1 | 3.57% |  |  |  |  |

**Table 3 Adverse Events**

(小数点后一位


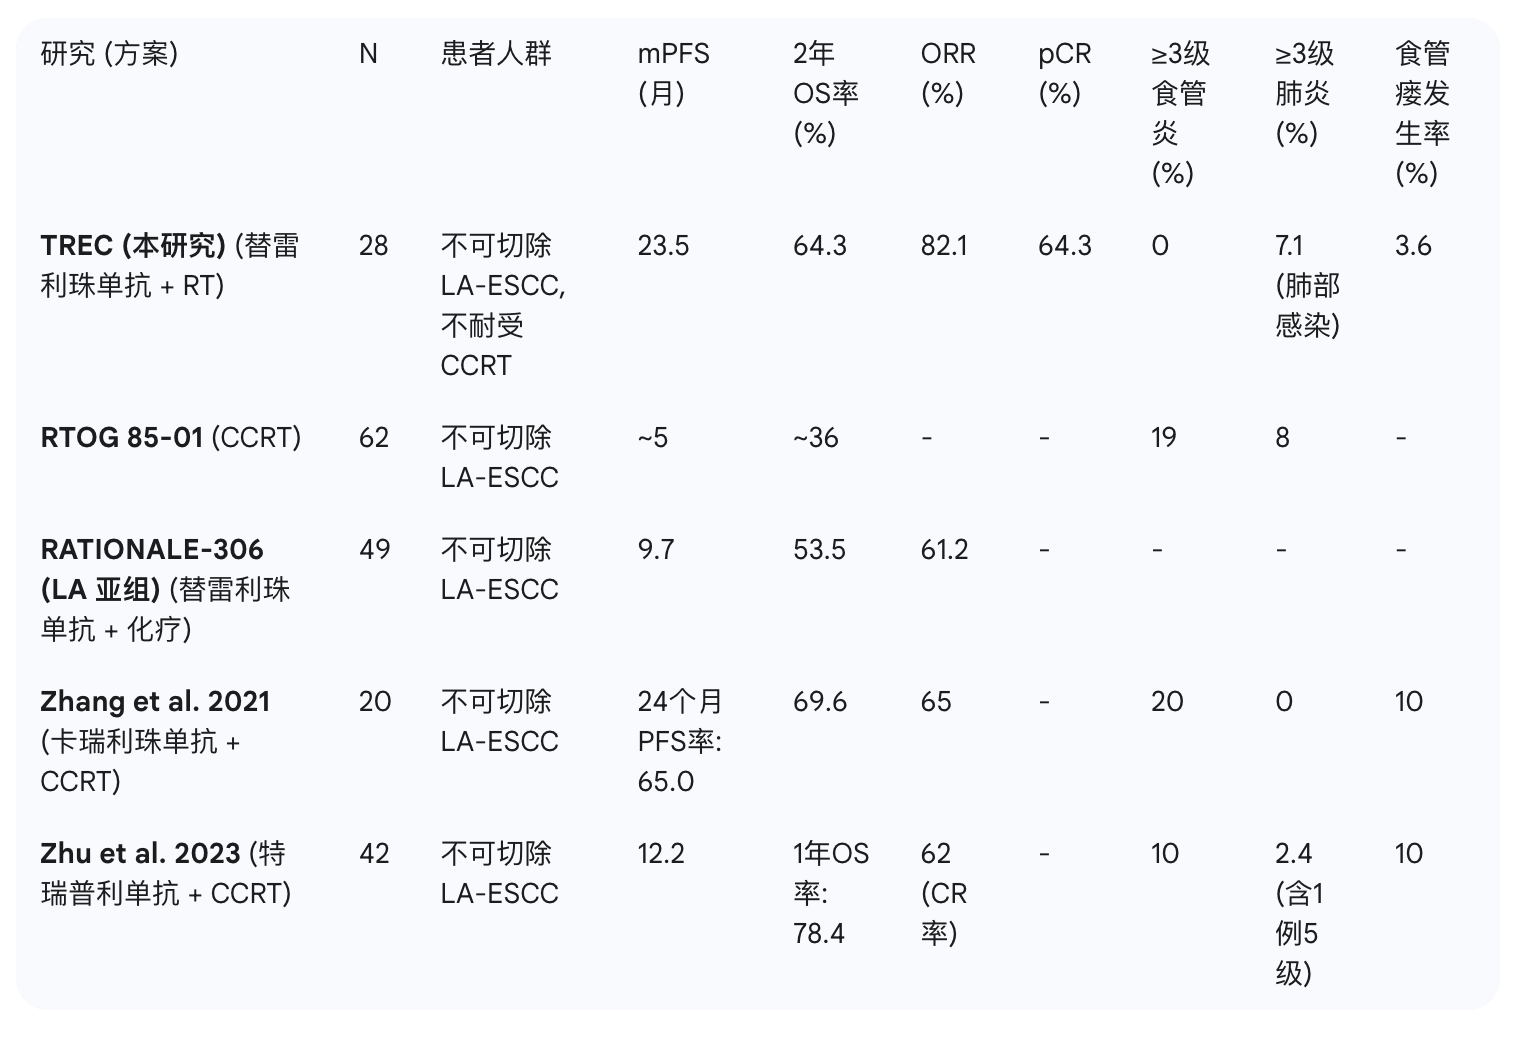


| Study(Regimen) | N | Patient Population | mPFS (months) | 1. year rate   OS(months) | ORR(%) | pCR(%) | ≥G3 Esophagitis (%) | ≥G3 Pneumonitis (%) | Esophageal Fistula (%) |
| --- | --- | --- | --- | --- | --- | --- | --- | --- | --- |
| TREC(Tislelizumab + RT) | 28 | Unresectable LA-ESCC, CCRT-intolerant | 23.5 | 64.3% | 82.1 | 64.3 | 0 | 7.1 | 3.6 |
| RTOG 85-01(CCRT) | 62 | Unresectable LA-ESCC | 5 | 36% | N/A | N/A | 19 | 8 | N/A |
| RATIONALE-306 (Tislelizumab + Chemo) | 49 | Unresectable LA-ESCC | 9.7 | 53.5% | 61.2 | N/A | N/A | N/A | N/A |
| Zhang et al. 2021 (Camrelizumab + CCRT) | 20 | Unresectable LA-ESCC | N/Aᵇ | 69.6% | 65 | N/A | 20 | 0 | 10 |
| Zhu et al. 2023 (Toripalimab + CCRT) | 42 | Unresectable LA-ESCC | 12.2 | 78.4%ᶜ | 62ᵈ | N/A | 10 | 2.4ᵉ | 10 |

footnotes：

ᵃ Reported as Grade ≥3 lung infection.

ᵇ The 24-month PFS rate was reported as 65.0%.

ᶜ The 1-year OS rate is shown.

ᵈ This value represents the CR rate, not the ORR.

ᵉ Includes one Grade 5 event.
